# Supplementary material
Source: ML conference proceedings conference paper supplement (https://openreview.net/forum?id=NxlsOnkGYV)

# Dirichlet Energy

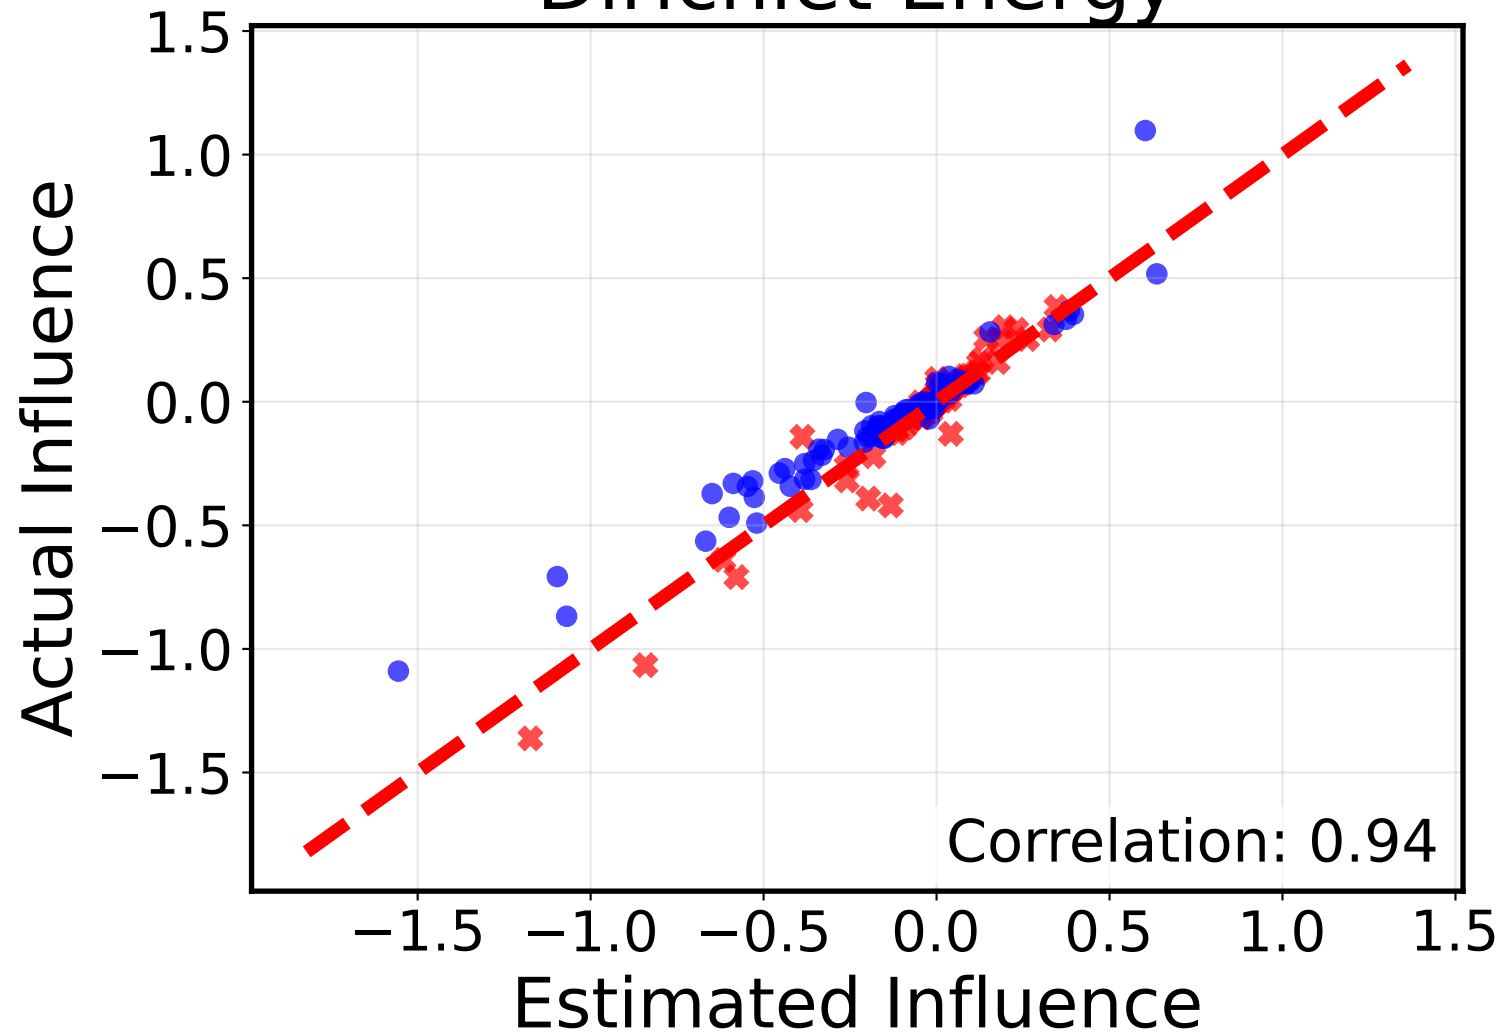

Supplement: supplementary_material [file influence_vs_pbrf.pdf › supple/code/configs/results/configs/DE_ours_edit/influence_vs_pbrf.pdf]

# Dirichlet Energy

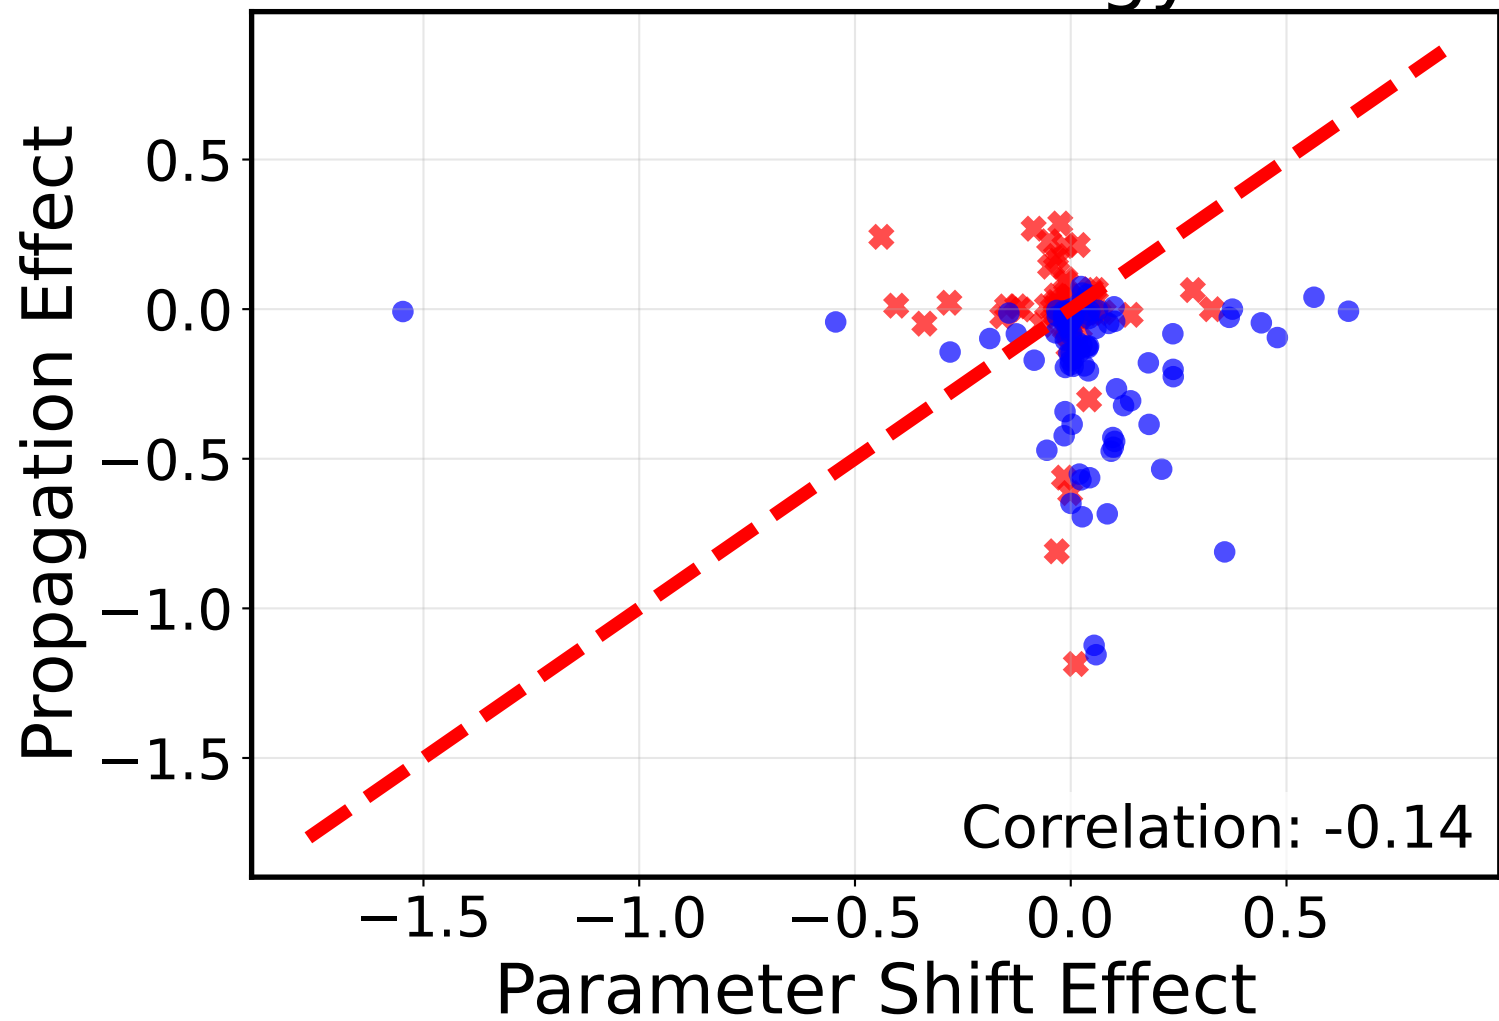

Supplement: supplementary_material [file retraining_vs_perturbing.pdf › supple/code/configs/results/configs/DE_ours_edit/retraining_vs_perturbing.pdf]

# Over-squashing

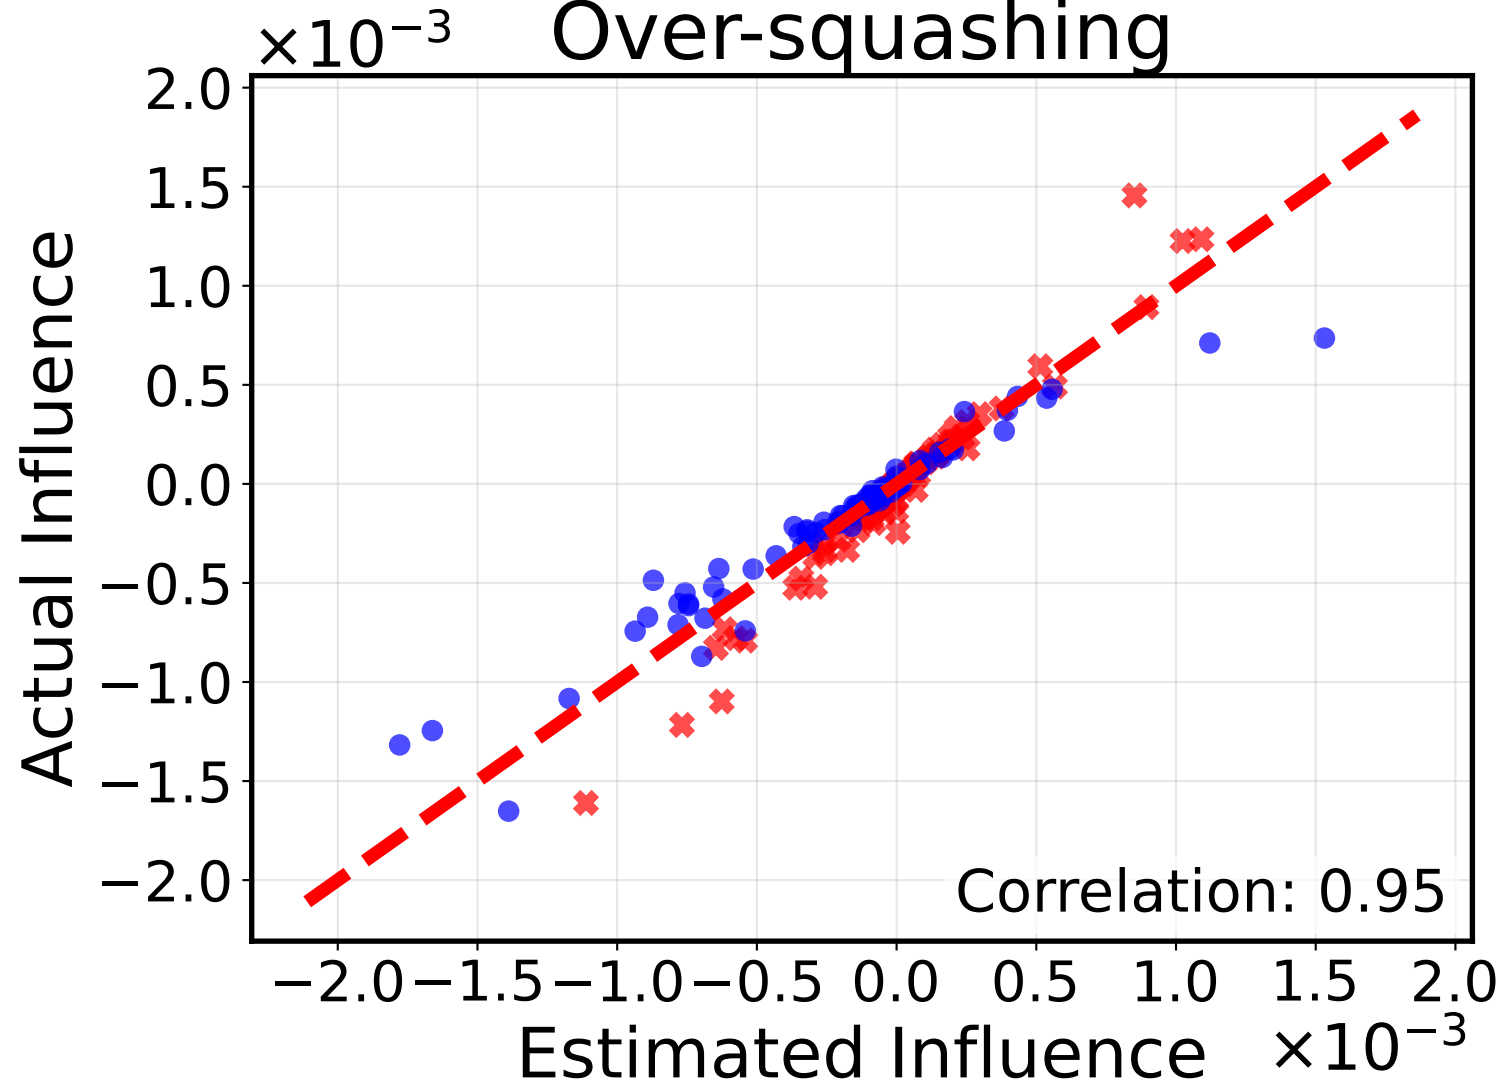

Supplement: supplementary_material [file influence_vs_pbrf.pdf › supple/code/configs/results/configs/FA_ours_edit/influence_vs_pbrf.pdf]

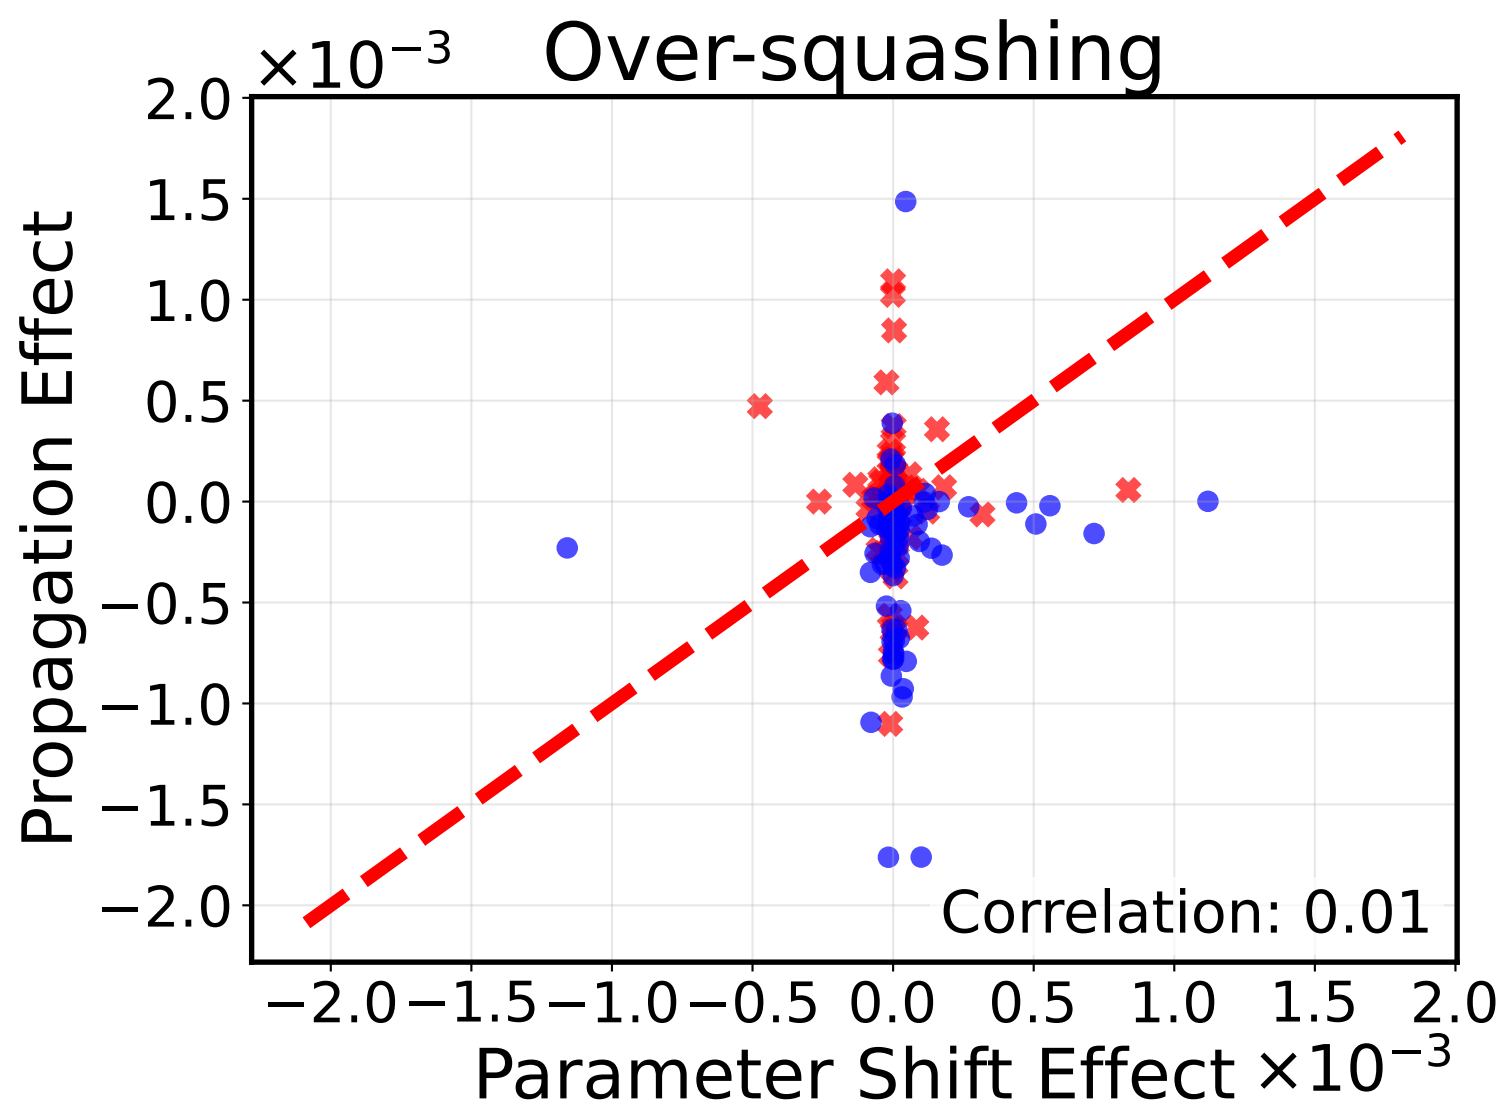

Supplement: supplementary_material [file retraining_vs_perturbing.pdf › supple/code/configs/results/configs/FA_ours_edit/retraining_vs_perturbing.pdf]

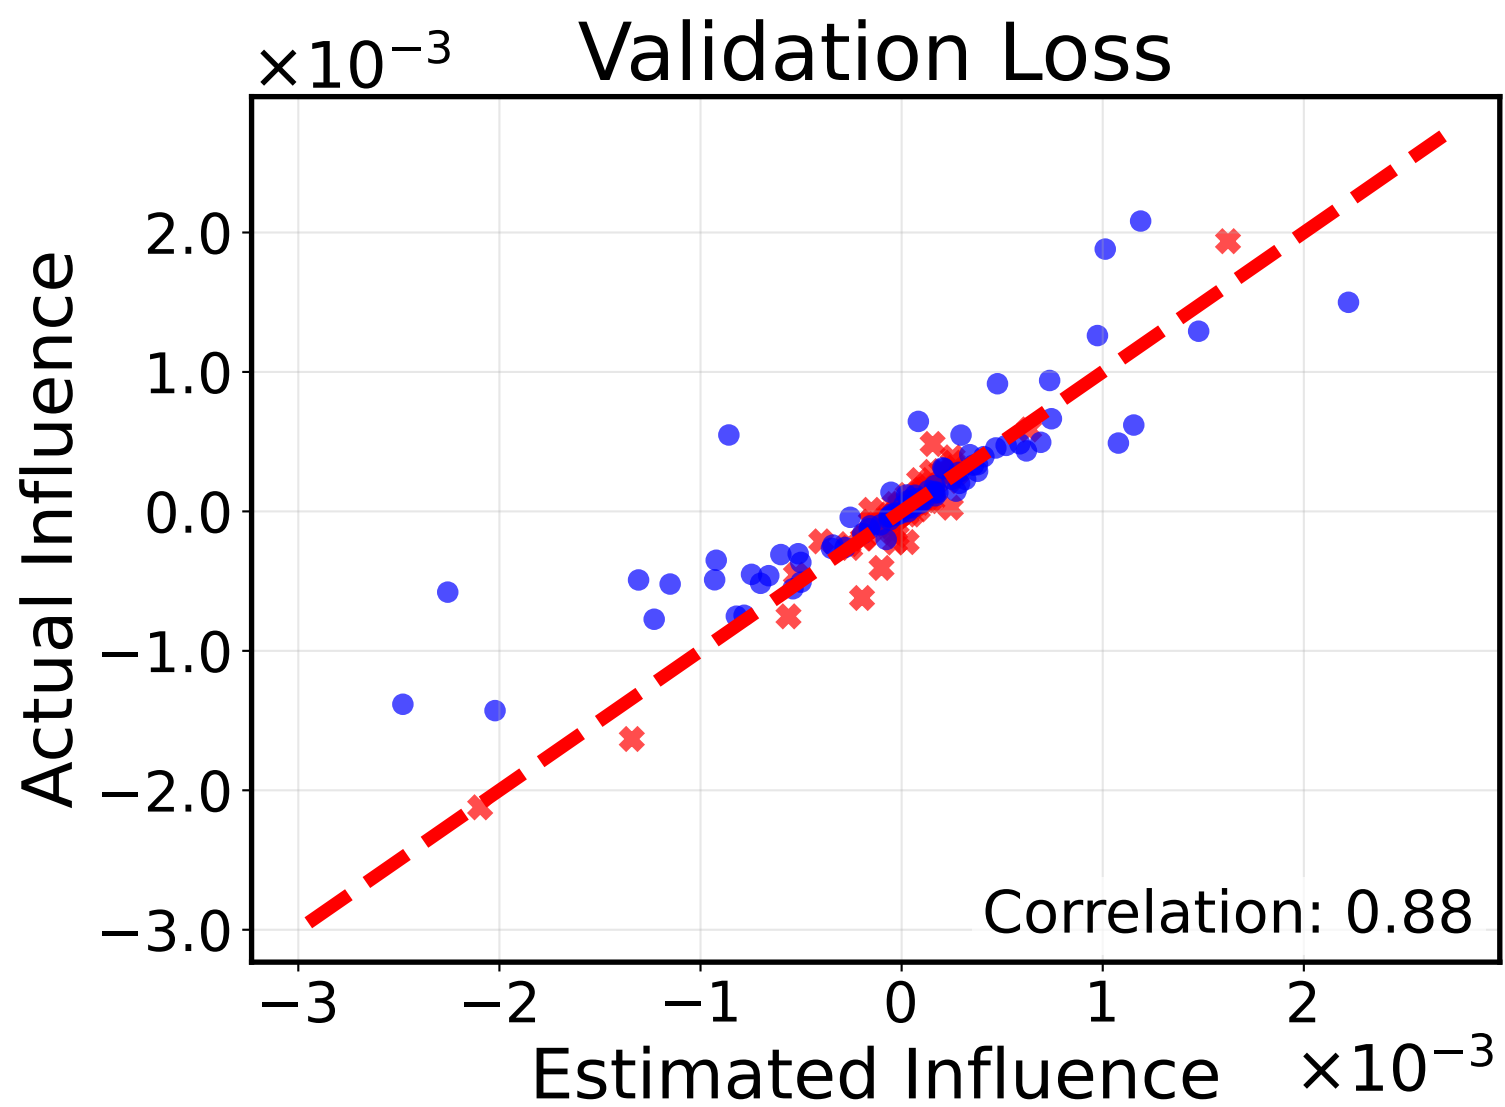

Supplement: supplementary_material [file influence_vs_pbrf.pdf › supple/code/configs/results/configs/MVL_ours_edit/influence_vs_pbrf.pdf]

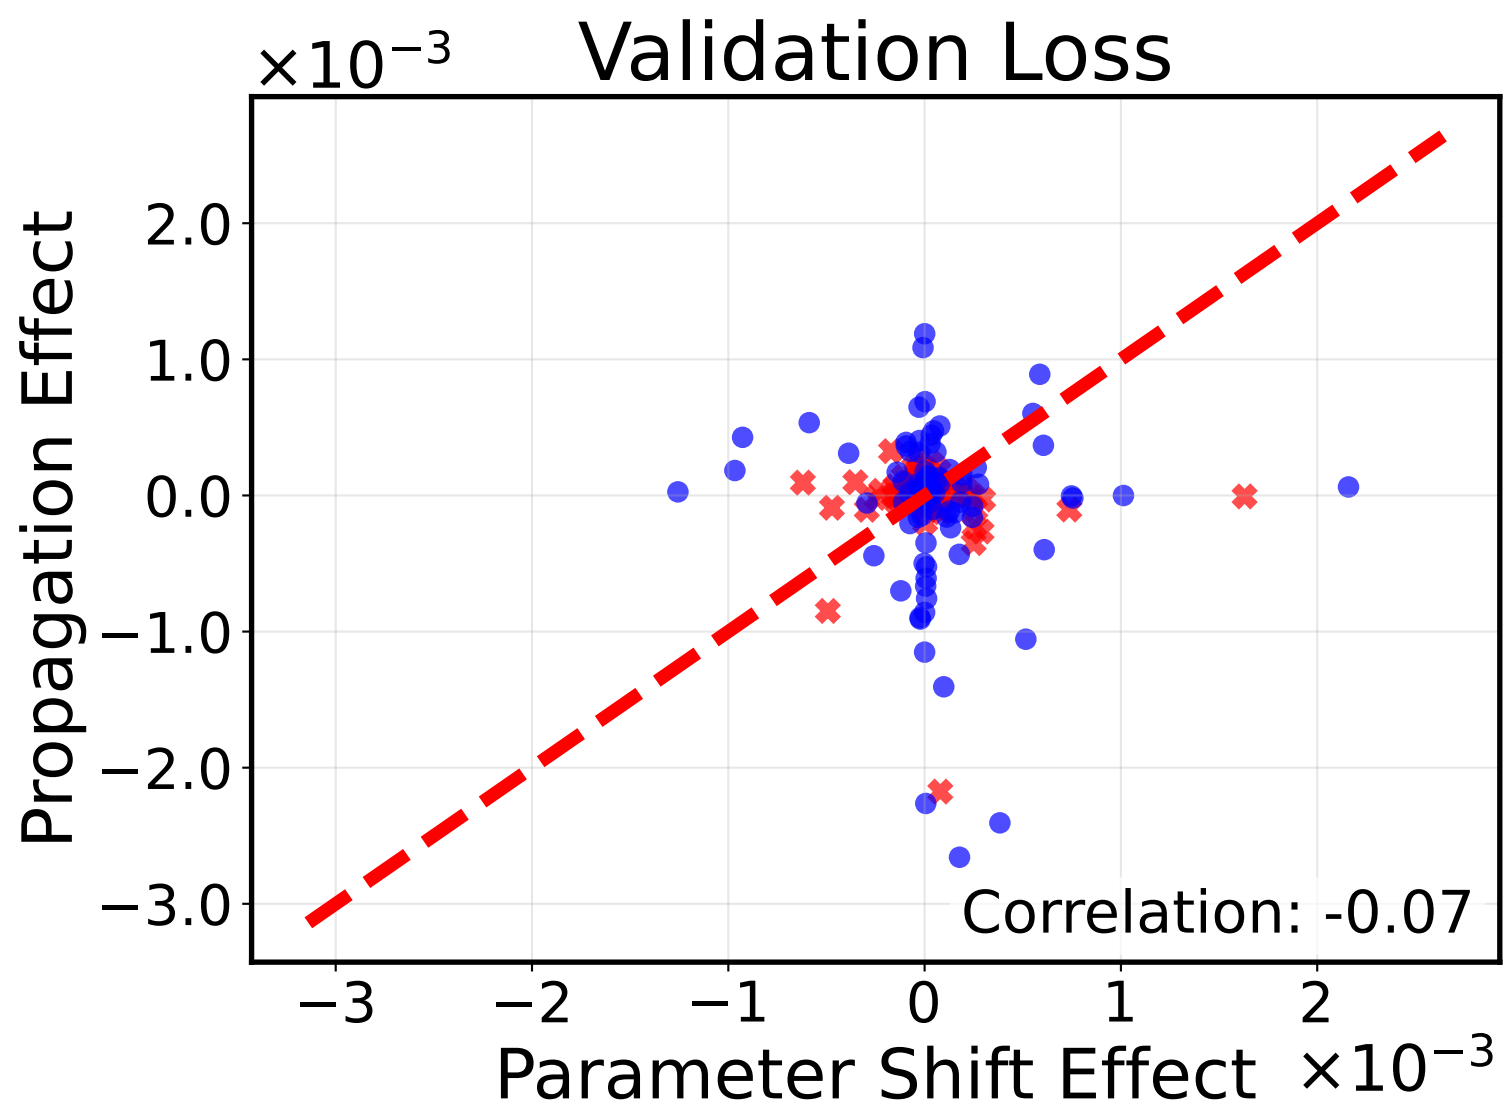

Supplement: supplementary_material [file retraining_vs_perturbing.pdf › supple/code/configs/results/configs/MVL_ours_edit/retraining_vs_perturbing.pdf]
